# Supplementary material
Source: HighWire-hosted journal article supplement (https://jnis.bmj.com/highwire/filestream/168430/field_highwire_adjunct_files/0/neurintsurg-2021-017842supp001_data_supplement.pdf)
Supplement: neurintsurg-2021-017842supp001_data_supplement.pdf [file neurintsurg-2021-017842supp001_data_supplement.pdf]

## SUPPLEMENTARY MATERIAL

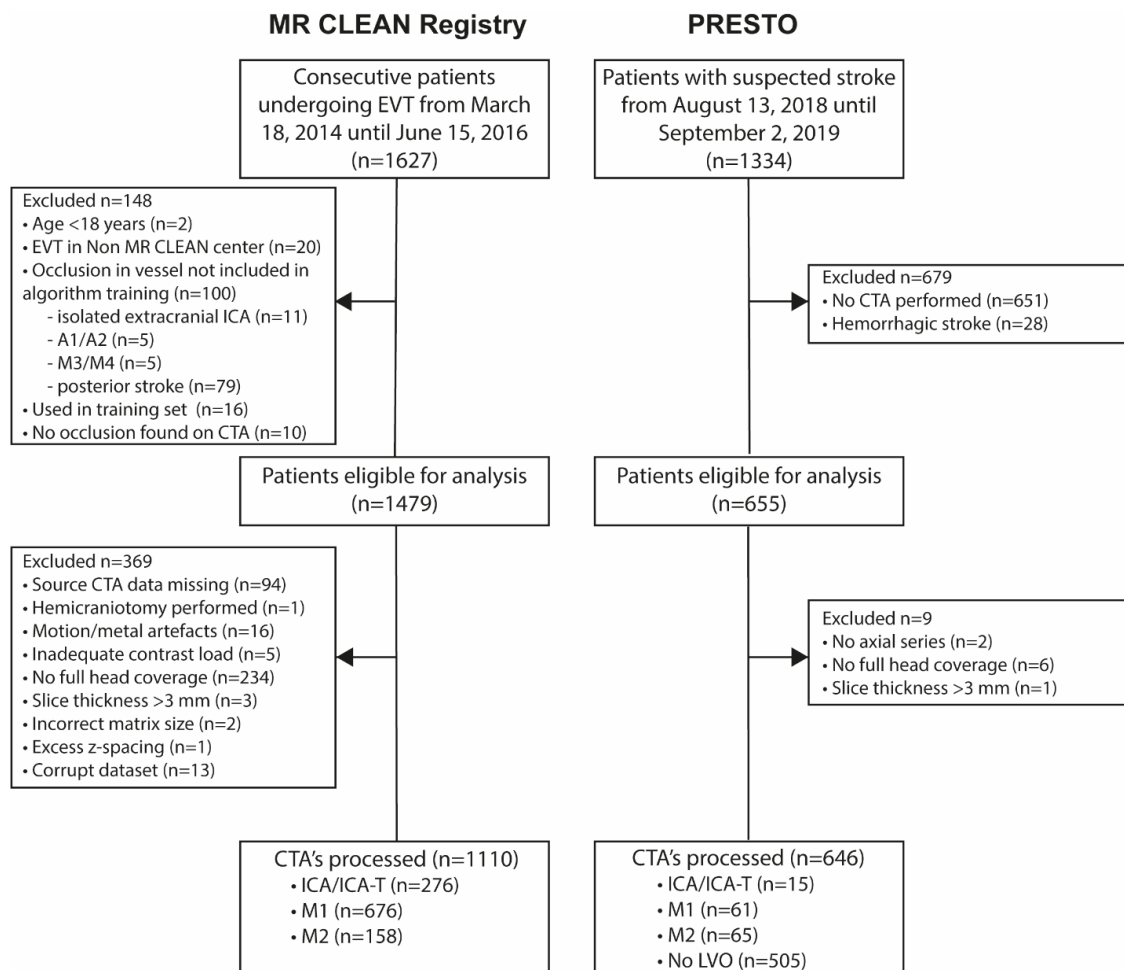

**Supplementary Figure 1.** Patient inclusion and exclusion flowchart EVT indicates endovascular treatment; CTA, computed tomography angiography; LVO, large vessel occlusion; ICA, internal carotid artery; ICA, internal carotid artery terminus; M1, M1 segment of the middle cerebral artery; M2, M2 segment of the middle cerebral artery; A1/A2, A1 or A2 segment of the anterior cerebral artery; M3/M4, M3 or M4 segment of the middle cerebral artery; MIP, maximum intensity projection; mm, millimeters

**Supplementary Table 1.** Patient characteristics per cohort

|                                         | <b>MR CLEAN Registry<br/>(n=1110)</b> | <b>PRESTO<br/>(n=646)</b> |
|-----------------------------------------|---------------------------------------|---------------------------|
| <b>Age</b> , median (IQR)               | 71 (60-80)                            | 73 (62-82)                |
| <b>Sex</b> , male (%)                   | 584 (52.6)                            | 358 (55.4)                |
| <b>NIHSS at baseline</b> , median (IQR) | 16 (12-20)                            | 4 (2-9)                   |
| <b>ASPECTS</b> , median (IQR)           | 9 (7-10)                              | n/a*                      |
| <b>Occlusion side</b> , left (%)        | 586 (52.8)                            | 74 (45.7)†                |
| <b>Occlusion location</b> (%)           |                                       |                           |
| Extracranial ICA (isolated)             | n/a                                   | 2 (1.2)†                  |
| Extracranial ICA (with tandem lesion)   | 37 (3.3)                              | 3 (1.9)†                  |
| Intracranial ICA                        | 19 (1.7)                              | 5 (3.1)†                  |
| ICA-T                                   | 256 (23.1)                            | 10 (6.2)†                 |
| M1                                      | 651 (58.6)                            | 60 (37.0)†                |
| M2                                      | 147 (13.2)                            | 63 (38.9)†                |
| M3/M4                                   | n/a                                   | 2 (1.2)†                  |
| A1/A2                                   | n/a                                   | 4 (2.5)†                  |
| Vertebral artery                        | n/a                                   | 2 (1.2)†                  |
| Basilar artery                          | n/a                                   | 6 (3.7)†                  |
| P1/P2                                   | n/a                                   | 5 (3.1)†                  |
| No occlusion                            | 0 (0.0)                               | 484 (74.9)                |
| <b>Slice thickness</b> , mm (%)         |                                       |                           |
| <1                                      | 503 (45.3)                            | 453 (70.1)                |
| 1-2                                     | 304 (27.4)                            | 128 (19.8)                |
| ≥2                                      | 303 (27.3)                            | 65 (10.1)                 |
| <b>Slice overlap</b> (%)                |                                       |                           |
| Yes                                     | 821 (74.0)                            | 481 (74.5)                |
| No                                      | 289 (26.0)                            | 165 (25.5)                |
| <b>Peak Kilovoltage</b> , kV (%)        |                                       |                           |
| ≥120                                    | 553 (49.8)                            | 319 (49.4)                |
| <120                                    | 557 (50.2)                            | 327 (50.6)                |
| <b>Scan phase</b> (%)                   |                                       |                           |
| Early arterial                          | 295 (26.6)                            | 177 (27.4)                |
| Peak arterial                           | 187 (16.8)                            | 316 (48.9)                |
| Equilibrium                             | 296 (26.7)                            | 120 (18.6)                |
| Peak venous                             | 230 (20.7)                            | 28 (4.3)                  |
| Late venous                             | 102 (9.2)                             | 5 (0.8)                   |

\*ASPECTS was not assessed in PRESTO

†Numbers between parentheses are percentages of total amount of patients with an occlusion (n=162)

NIHSS indicates National Institutes of Health Stroke Scale; ASPECTS, Alberta Stroke Program Early CT Score; ICA, internal carotid artery; ICA-T, internal carotid artery terminus; M1, M1 segment of the middle cerebral artery; M2, M2 segment of the middle cerebral artery; mm, millimeters; kV, kilovoltage.

**Supplementary Table 2.** Cross-table with occlusion location indicated by the algorithm (rows) versus reference (columns) in the MR CLEAN Registry

|                                                      | <b>Intracranial ICA/ICA-T</b> | <b>M1</b> | <b>M2</b> | <b>No LVO</b> | <b>Total</b> |
|------------------------------------------------------|-------------------------------|-----------|-----------|---------------|--------------|
| <b>Intracranial ICA/ICA-T</b>                        | 243                           | 5         | 0         | 0             | 248          |
| <b>M1</b>                                            | 3                             | 636       | 4         | 0             | 643          |
| <b>M2</b>                                            | 0                             | 0         | 113       | 0             | 113          |
| <b>No LVO</b>                                        | 8                             | 13        | 25        | 0             | 46           |
| <b>Box in affected hemisphere, but not on vessel</b> | 11                            | 14        | 11        | 0             | 36           |
| <b>Box in unaffected hemisphere</b>                  | 11                            | 8         | 5         | 0             | 24           |
| <b>Total</b>                                         | 276                           | 676       | 158       | 0             | 1110         |

ICA indicates internal carotid artery; ICA-T, internal carotid artery terminus; M1, M1 segment of middle cerebral artery; M2, M2 segment of middle cerebral artery; LVO, large vessel occlusion.

**Supplementary Table 3.** Cross-table with occlusion location indicated by the algorithm (rows) versus reference (columns) in PRESTO

|                                                      | Extracranial<br>ICA | Intracranial<br>ICA/ICA-T | M1 | M2 | M3/M4 | A1/A2 | Vertebral<br>artery | Basilar<br>artery | P1/P2 | No LVO | Total |
|------------------------------------------------------|---------------------|---------------------------|----|----|-------|-------|---------------------|-------------------|-------|--------|-------|
| <b>Intracranial ICA/ICA-T</b>                        | 1                   | 12                        | 0  | 0  | 0     | 0     | 0                   | 0                 | 0     | 4      | 17    |
| <b>M1</b>                                            | 1                   | 0                         | 58 | 0  | 0     | 0     | 0                   | 0                 | 0     | 20     | 79    |
| <b>M2</b>                                            | 0                   | 0                         | 0  | 32 | 0     | 1     | 0                   | 0                 | 0     | 60     | 93    |
| <b>No LVO</b>                                        | 0                   | 2                         | 0  | 27 | 2     | 3     | 1                   | 6                 | 4     | 376    | 421   |
| <b>Box in affected hemisphere, but not on vessel</b> | 0                   | 1                         | 0  | 3  | 0     | 0     | 0                   | 0                 | 1     | 0      | 29    |
| <b>Box in unaffected hemisphere</b>                  | 0                   | 0                         | 3  | 3  | 0     | 0     | 1                   | 0                 | 0     | 24†    | 7     |
| <b>Total</b>                                         | 2                   | 15                        | 61 | 65 | 2     | 4     | 2                   | 6                 | 5     | 484    | 646   |

†Patients without LVO and no affected hemisphere

ICA indicates internal carotid artery; ICA-T, internal carotid artery terminus; M1, M1 segment of middle cerebral artery; M2, M2 segment of middle cerebral artery; LVO, large vessel occlusion.

**Supplementary Table 4.** Diagnostic performance for LVO detection according to imaging quality in pooled cohort (MR CLEAN Registry and PRESTO)

|                             | LVO present/<br>LVO absent | Sensitivity (95% CI) | Specificity (95% CI) | AUC (95% CI)     |
|-----------------------------|----------------------------|----------------------|----------------------|------------------|
| <b>Slice thickness, mm</b>  |                            |                      |                      |                  |
| <1                          | 603/353                    | 86 (83-89)           | 80 (75-84)           | 0.83 (0.81-0.86) |
| 1-2                         | 331/101                    | 89 (85-92)           | 81 (72-88)           | 0.85 (0.81-0.89) |
| ≥2                          | 317/51                     | 88 (84-91)           | 55 (40-69)           | 0.71 (0.64-0.78) |
| <b>Slice overlap</b>        |                            |                      |                      |                  |
| Yes                         | 932/370                    | 87 (85-89)           | 80 (75-84)           | 0.84 (0.81-0.86) |
| No                          | 319/135                    | 88 (84-91)           | 72 (63-79)           | 0.80 (0.76-0.84) |
| <b>Peak Kilovoltage, kv</b> |                            |                      |                      |                  |
| <120                        | 633/251                    | 87 (84-90)           | 78 (72-83)           | 0.82 (0.80-0.85) |
| ≥120                        | 618/254                    | 88 (85-90)           | 78 (72-83)           | 0.83 (0.80-0.86) |
| <b>Scan Phase</b>           |                            |                      |                      |                  |
| Arterial                    | 589/386                    | 88 (85-90)           | 77 (72-81)           | 0.82 (0.80-0.85) |
| Equilibrium                 | 323/93                     | 90 (86-93)           | 84 (75-91)           | 0.87 (0.83-0.91) |
| Venous                      | 339/26                     | 84 (80-88)           | 65 (44-83)           | 0.75 (0.65-0.84) |

Sensitivity and specificity are presented as percentages. LVO indicates large vessel occlusion; AUC, area under the curve; mm, millimeters; kV, kilovoltage.

**Supplementary Table 5.** Sensitivity per occlusion according to imaging quality in the MR CLEAN Registry

|                             | ICA/ICA-T |                      | M1  |                      | M2  |                      |
|-----------------------------|-----------|----------------------|-----|----------------------|-----|----------------------|
|                             | N         | Sensitivity (95% CI) | N   | Sensitivity (95% CI) | N   | Sensitivity (95% CI) |
| <b>Slice thickness, mm</b>  |           |                      |     |                      |     |                      |
| <1                          | 117       | 89 (82-94)           | 303 | 93 (89-95)           | 83  | 78 (68-87)           |
| 1-2                         | 78        | 83 (73-91)           | 187 | 96 (92-98)           | 39  | 72 (55-85)           |
| ≥2                          | 81        | 89 (80-95)           | 186 | 94 (90-97)           | 36  | 56 (38-72)           |
| <b>Slice overlap</b>        |           |                      |     |                      |     |                      |
| Yes                         | 191       | 87 (82-92)           | 508 | 94 (92-96)           | 122 | 75 (66-82)           |
| No                          | 85        | 89 (81-95)           | 168 | 93 (89-97)           | 36  | 61 (43-77)           |
| <b>peak Kilovoltage, kV</b> |           |                      |     |                      |     |                      |
| <120                        | 132       | 86 (79-92)           | 344 | 94 (90-96)           | 81  | 74 (63-83)           |
| ≥120                        | 144       | 90 (83-94)           | 332 | 95 (92-97)           | 77  | 69 (57-79)           |
| <b>Scan phase</b>           |           |                      |     |                      |     |                      |
| Arterial                    | 108       | 89 (81-94)           | 298 | 96 (93-98)           | 76  | 79 (68-87)           |
| Equilibrium                 | 68        | 91 (82-97)           | 183 | 95 (90-97)           | 45  | 73 (58-85)           |
| Venous                      | 100       | 85 (76-91)           | 195 | 91 (86-95)           | 37  | 54 (37-71)           |

Sensitivity is presented as percentage. ICA indicates internal carotid artery; ICA-T, internal carotid artery terminus; M1, M1 segment of middle cerebral artery; M2, M2 segment of middle cerebral artery; mm, millimeters; kV, kilovoltage.

## MR CLEAN Registry Investigators

### Executive committee

Diederik W.J. Dippel<sup>1</sup>; Aad van der Lugt<sup>2</sup>; Charles B.L.M. Majoie<sup>3</sup>; Yvo B.W.E.M. Roos<sup>4</sup>; Robert J. van Oostenbrugge<sup>5</sup>; Wim H. van Zwam<sup>6</sup>; Jelis Boiten<sup>14</sup>; Jan Albert Vos<sup>8</sup>

### Study coordinators

Ivo G.H. Jansen<sup>3</sup>; Maxim J.H.L. Mulder<sup>1,2</sup>; Robert-Jan B. Goldhoorn<sup>5,6</sup>; Kars C.J. Compagne<sup>2</sup>; Manon Kappelhof<sup>3</sup>

### Local principal investigator

Wouter J. Schonewille<sup>7</sup>; Jan Albert Vos<sup>8</sup>; Charles B.L.M. Majoie<sup>3</sup>; Jonathan M. Coutinho<sup>4</sup>; Marieke J.H. Wermer<sup>9</sup>; Marianne A.A. van Walderveen<sup>10</sup>; Julie Staals<sup>5</sup>; Wim H. van Zwam<sup>6</sup>; Jeannette Hofmeijer<sup>11</sup>; Jasper M. Martens<sup>12</sup>; Geert J. Lycklama à Nijeholt<sup>13</sup>; Jelis Boiten<sup>14</sup>; Bob Roozenbeek<sup>1</sup>; Bart J. Emmer<sup>2</sup>; Sebastiaan F. de Bruijn<sup>15</sup>; Lukas C. van Dijk<sup>16</sup>; H. Bart van der Worp<sup>17</sup>; Rob H. Lo<sup>18</sup>; Ewoud J. van Dijk<sup>19</sup>; Hieronymus D. Boogaarts<sup>20</sup>; Paul L.M. de Kort<sup>21</sup>; Julia van Tuijl<sup>21</sup>; Jo J.P. Peluso<sup>26</sup>; Jan S.P. van den Berg<sup>22</sup>; Boudewijn A.A.M. van Hasselt<sup>23</sup>; Leo A.M. Aerden<sup>24</sup>; René J. Dallinga<sup>25</sup>; Maarten Uyttenboogaart<sup>28</sup>; Omid Eshghi<sup>29</sup>; Reinoud P.H. Bokkers<sup>29</sup>; Tobien H.C.M.L. Schreuder<sup>30</sup>; Roel J.J. Heijboer<sup>31</sup>; Koos Keizer<sup>32</sup>; Lonneke S.F. Yo<sup>33</sup>; Heleen M. den Hertog<sup>22</sup>; Emiel J.C. Sturm<sup>35</sup>

### Imaging assessment committee

Charles B.L.M. Majoie<sup>3</sup> (chair); Wim H. van Zwam<sup>6</sup>; Aad van der Lugt<sup>2</sup>; Geert J. Lycklama à Nijeholt<sup>13</sup>; Marianne A.A. van Walderveen<sup>10</sup>; Marieke E.S. Sprengers<sup>3</sup>; Sjoerd F.M. Jenniskens<sup>27</sup>; René van den Berg<sup>3</sup>; Albert J. Yoo<sup>37</sup>; Ludo F.M. Beenen<sup>3</sup>; Alida A. Postma<sup>6</sup>; Stefan D. Roosendaal<sup>3</sup>; Bas F.W. van der Kallen<sup>13</sup>; Ido R. van den Wijngaard<sup>13</sup>; Adriaan C.G.M. van Es<sup>2</sup>; Bart J. Emmer<sup>2,3</sup>; Jasper M. Martens<sup>12</sup>; Lonneke S.F. Yo<sup>33</sup>; Jan Albert Vos<sup>8</sup>; Joost Bot<sup>36</sup>; Pieter-Jan van Doormaal<sup>2</sup>.

### Writing committee

Diederik W.J. Dippel<sup>1</sup> (chair); Aad van der Lugt<sup>2</sup>; Charles B.L.M. Majoie<sup>3</sup>; Yvo B.W.E.M. Roos<sup>4</sup>; Robert J. van Oostenbrugge<sup>5</sup>; Wim H. van Zwam<sup>6</sup>; Geert J. Lycklama à Nijeholt<sup>13</sup>; Jelis Boiten<sup>14</sup>; Jan Albert Vos<sup>8</sup>; Wouter J. Schonewille<sup>7</sup>; Jeannette Hofmeijer<sup>11</sup>; Jasper M. Martens<sup>12</sup>; H. Bart van der Worp<sup>17</sup>; Rob H. Lo<sup>18</sup>

### Adverse event committee

Robert J. van Oostenbrugge<sup>5</sup> (chair); Jeannette Hofmeijer<sup>11</sup>; H. Zwenneke Flach<sup>23</sup>

### Trial methodologist

Hester F. Lingsma<sup>38</sup>

### Research nurses / local trial coordinators

Naziha el Ghannouti<sup>1</sup>; Martin Sterrenberg<sup>1</sup>; Corina Puppels<sup>7</sup>; Wilma Pellikaan<sup>7</sup>; Rita Sprengers<sup>4</sup>; Marjan Elfrink<sup>11</sup>; Joke de Meris<sup>14</sup>; Tamara Vermeulen<sup>14</sup>; Annet Geerlings<sup>19</sup>; Gina van Vemde<sup>22</sup>; Tiny Simons<sup>30</sup>; Cathelijn van Rijswijk<sup>21</sup>; Gert Messchendorp<sup>28</sup>; Hester Bongenaar<sup>32</sup>; Karin Bodde<sup>24</sup>; Sandra Kleijn<sup>34</sup>; Jasmijn Lodico<sup>34</sup>; Hanneke Droste<sup>34</sup>; M. Wollaert<sup>5</sup>; D. Jeurissen<sup>5</sup>; Ernas Bos<sup>9</sup>; Yvonne Drabbe<sup>15</sup>; Nicoline Aaldering<sup>11</sup>; Berber Zweedijk<sup>17</sup>; Mostafa Khalilzada<sup>15</sup>.

### PhD / Medical students

Esmee Venema<sup>38</sup>; Vicky Chalos<sup>1,38</sup>; Ralph R. Geuskens<sup>3</sup>; Tim van Straaten<sup>19</sup>; Saliha Ergezen<sup>1</sup>; Roger R.M. Harmsma<sup>1</sup>; Daan Muijres<sup>1</sup>; Anouk de Jong<sup>1</sup>; Wouter Hinsenveld<sup>5,6</sup>; Olvert A. Berkhemer<sup>1,3,6</sup>; Anna M.M.

Boers<sup>3,39</sup>; J. Huguet<sup>3</sup>; P.F.C. Groot<sup>3</sup>; Marieke A. Mens<sup>3</sup>; Katinka R. van Kranendonk<sup>3</sup>; Kilian M. Treurniet<sup>3</sup>; Manon L. Tolhuijsen<sup>3</sup>; Heitor Alves<sup>3</sup>.

#### List of affiliations

Department of Neurology<sup>1</sup>, Radiology<sup>2</sup>, Public Health<sup>38</sup>, Erasmus MC University Medical Center; Department of Radiology and Nuclear Medicine<sup>3</sup>, Neurology<sup>4</sup>, Biomedical Engineering & Physics<sup>39</sup>, Amsterdam UMC, University of Amsterdam, Amsterdam;  
Department of Neurology<sup>5</sup>, Radiology<sup>6</sup>, Maastricht University Medical Center and Cardiovascular Research Institute Maastricht (CARIM);  
Department of Neurology<sup>7</sup>, Radiology<sup>8</sup>, Sint Antonius Hospital, Nieuwegein;  
Department of Neurology<sup>9</sup>, Radiology<sup>10</sup>, Leiden University Medical Center;  
Department of Neurology<sup>11</sup>, Radiology<sup>12</sup>, Rijnstate Hospital, Arnhem;  
Department of Radiology<sup>13</sup>, Neurology<sup>14</sup>, Haaglanden MC, the Hague;  
Department of Neurology<sup>15</sup>, Radiology<sup>16</sup>, Haga Hospital, the Hague;  
Department of Neurology<sup>17</sup>, Radiology<sup>18</sup>, University Medical Center Utrecht;  
Department of Neurology<sup>19</sup>, Neurosurgery<sup>20</sup>, Radiology<sup>27</sup>, Radboud University Medical Center, Nijmegen;  
Department of Neurology<sup>21</sup>, Radiology<sup>26</sup>, Elisabeth-TweeSteden ziekenhuis, Tilburg;  
Department of Neurology<sup>22</sup>, Radiology<sup>23</sup>, Isala Klinieken, Zwolle;  
Department of Neurology<sup>24</sup>, Radiology<sup>25</sup>, Reinier de Graaf Gasthuis, Delft;  
Department of Neurology<sup>28</sup>, Radiology<sup>29</sup>, University Medical Center Groningen;  
Department of Neurology<sup>30</sup>, Radiology<sup>31</sup>, Atrium Medical Center, Heerlen;  
Department of Neurology<sup>32</sup>, Radiology<sup>33</sup>, Catharina Hospital, Eindhoven;  
Department of Neurology<sup>34</sup>, Radiology<sup>35</sup>, Medisch Spectrum Twente, Enschede;  
Department of Radiology<sup>36</sup>, Amsterdam UMC, Vrije Universiteit van Amsterdam, Amsterdam;  
Department of Radiology<sup>37</sup>, Texas Stroke Institute, Texas, United States of America.

## **PRESTO Investigators**

#### Executive committee

Diederik W.J. Dippel<sup>1,2</sup>; Bob Roozenbeek<sup>1,2</sup>; Henk Kerkhoff<sup>3</sup>; Hester F. Lingsma<sup>4</sup>; Aad van der Lugt<sup>2</sup>; Adriaan C.G.M. van Es<sup>5</sup>; Anouk D. Rozeman<sup>3</sup>; Walid Moudrou<sup>6</sup>; Frédérique H. Vermeij<sup>7</sup>

#### Study Coordinators

Esmee Venema<sup>1,4</sup>; Martijne H.C. Duvekot<sup>1,3</sup>

#### Steering committee

Diederik W.J. Dippel<sup>1,2</sup>; Bob Roozenbeek<sup>1,2</sup>; Hester F. Lingsma<sup>4</sup>; Aad van der Lugt<sup>2</sup>; Adriaan C.G.M. van Es<sup>5</sup>; Henk Kerkhoff<sup>3</sup>; Anouk D. Rozeman<sup>3</sup>; Walid Moudrou<sup>6</sup>; Frédérique H. Vermeij<sup>7</sup>; Kees C.L. Alblas<sup>7</sup>; Laus J.M.M. Mulder<sup>8</sup>; Annemarie D. Wijnhoud<sup>9</sup>; Lisette Maasland<sup>10</sup>; Roeland P.J. van Eijkelenburg<sup>11</sup>; Marileen Biekart<sup>12</sup>; M.L. Willeboer<sup>13</sup>; Bianca Buijck<sup>14</sup>

#### Imaging committee

Bob Roozenbeek<sup>1,2</sup>; Henk Kerkhoff<sup>3</sup>; Aad van der Lugt<sup>2</sup>; Adriaan C.G.M. van Es<sup>5</sup>



#### Imaging core laboratory

Aad van der Lugt<sup>2</sup>; Adriaan C.G.M. van Es<sup>5</sup>; Pieter Jan van Doormaal<sup>2</sup>; Jeannette Bakker<sup>15</sup>; Jan-Hein Hensen<sup>16</sup>; Aarnout Plaisier<sup>17</sup>; Geert Lycklama à Nijeholt<sup>18</sup>

#### Local principal investigators

Diederik W.J. Dippel<sup>1</sup>; Bob Roozenbeek<sup>1,2</sup>; Aad van der Lugt<sup>2</sup>; Amber Hoek<sup>19</sup>; Henk Kerkhoff<sup>3</sup>; Anouk D. Rozeman<sup>3</sup>; Jeannette Bakker<sup>15</sup>; Erick Oskam<sup>20</sup>; Walid Moudrous<sup>6</sup>; Jan-Hein Hensen<sup>16</sup>; Frédérique H. Vermeij<sup>7</sup>; Mandy M.A. van der Zon<sup>21</sup>; Egon D. Zwets<sup>22</sup>; Kees C.L. Alblas<sup>7</sup>; Laus J.M.M. Mulder<sup>8</sup>; Jan Willem Kuiper<sup>23</sup>; Annemarie D. Wijnhoud<sup>9</sup>; Bruno J.M. van Moll<sup>9</sup>; Aarnout Plaisier<sup>17</sup>; Lisette Maasland<sup>10</sup>; Mirjam Woudenberg<sup>24</sup>; Roeland P.J. van Eijkelenburg<sup>11</sup>; Arnoud M. de Leeuw<sup>25</sup>

#### Local trial coordinators

Anja Noordam-Reijm<sup>12</sup>; Timo Bevelander<sup>13</sup>

#### PhD / Medical students

Vicky Chalos<sup>1,2,3</sup>; Eveline J.A. Wieggers<sup>4</sup>; Lennard Wolff<sup>2</sup>; Dennis C. van Kalker<sup>1</sup>; Jochem van den Biggelaar<sup>1</sup>

#### List of affiliations

Department of Neurology<sup>1</sup>, Radiology & Nuclear Medicine<sup>2</sup>, Public Health<sup>4</sup>, Emergency Medicine<sup>19</sup>, Erasmus MC University Medical Centre, Rotterdam;  
Department of Neurology<sup>3</sup>, Radiology<sup>15</sup>, Emergency Medicine<sup>20</sup>, Albert Schweitzer hospital, Dordrecht;  
Department of Radiology<sup>5</sup>, Leiden University Medical Center, Leiden;  
Department of Neurology<sup>6</sup>, Radiology<sup>16</sup>, Maasstad hospital, Rotterdam;  
Department of Neurology<sup>7</sup>, Radiology<sup>21</sup>, Emergency Medicine<sup>21</sup>, Franciscus Gasthuis & Vlietland, Rotterdam;  
Department of Neurology<sup>8</sup>, Radiology<sup>23</sup>, Ikazia hospital, Rotterdam;  
Department of Neurology<sup>9</sup>, Radiology<sup>17</sup>; IJsselland hospital, Rotterdam;  
Department of Neurology<sup>10</sup>, Radiology<sup>24</sup>, van Weel Bethesda hospital, Dirksland;  
Department of Neurology<sup>11</sup>, Radiology<sup>25</sup>, Rivas Zorggroep Beatrix hospital, Gorinchem;  
Ambulance service Rotterdam-Rijnmond<sup>12</sup>, Barendrecht;  
Ambulance service Zuid-Holland Zuid<sup>13</sup>, Papendrecht;  
Rotterdam Stroke Service<sup>14</sup>, Rotterdam;  
Department of Radiology<sup>18</sup>, Haaglanden Medical Center, The Hague.
